# Supplementary material
Source: publisher figshare collection journal article supplement (https://acs.figshare.com/ndownloader/files/3754195)
Supplement: Supplementary file 1 [file 3754195]

# **A single component conductor based on radical gold dithiolene complex with alkyl-substituted thiophene-2,3-dithiolate ligand**

Toshiki Higashino,<sup>†,‡</sup> Olivier Jeannin,<sup>†</sup> Tadashi Kawamoto,<sup>‡</sup> Dominique Lorcy,<sup>†</sup> Takehiko Mori,<sup>‡</sup> and Marc Fourmigué<sup>\*,†</sup>

<sup>†</sup> Institut des Sciences Chimiques de Rennes (ISCR), Université Rennes 1, UMR CNRS 6226, Campus de Beaulieu, 35042 Rennes (France)

<sup>‡</sup> Department of Organic and Polymeric Materials, Tokyo Institute of Technology, O-okayama 2-12-1, Meguro-ku, 152-8552, Japan.

E-mail: marc.fourmigue@univ-rennes1.fr

## **Supplementary material**

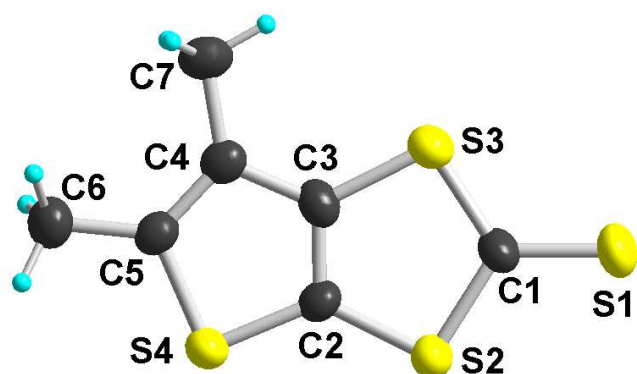

**Figure S1.** Molecular structure of **1a**. Ortep ellipsoids at 50% probability level.

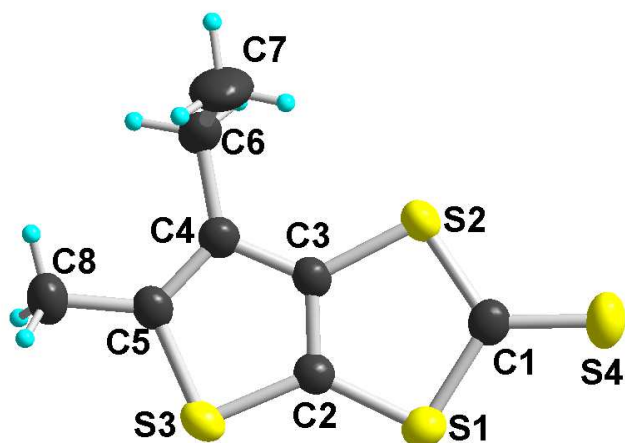

**Figure S2.** Molecular structure of **1b**. Ortep ellipsoids at 50% probability level.

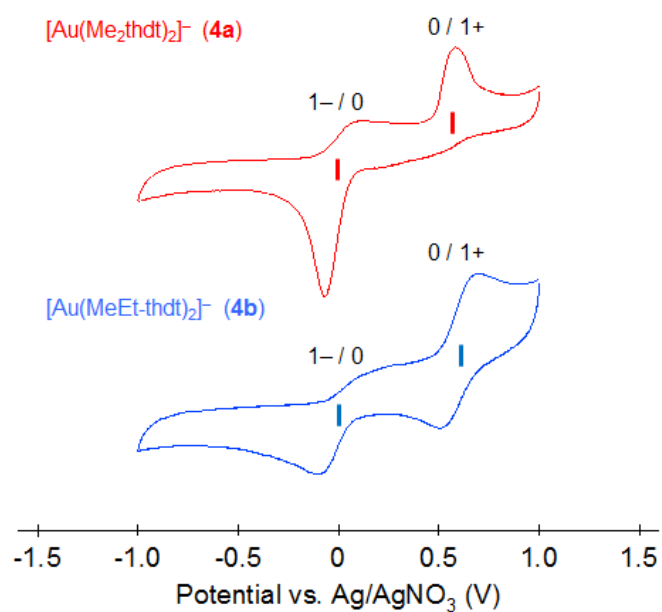

**Figure S3.** Cyclic voltammograms of **4a** (top) and **4b** (bottom) measured at a scan rate of 100 mV/s.

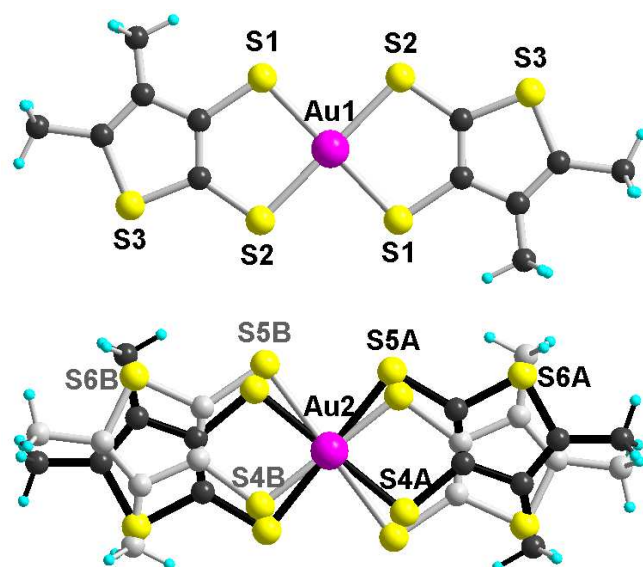

**Figure S4.** Molecular structures of the two crystallographically independent complexes in the  $\text{PPh}_4[\text{Au}(\alpha\text{-Me}_2\text{tpdt})_2]$  salt **4a**.

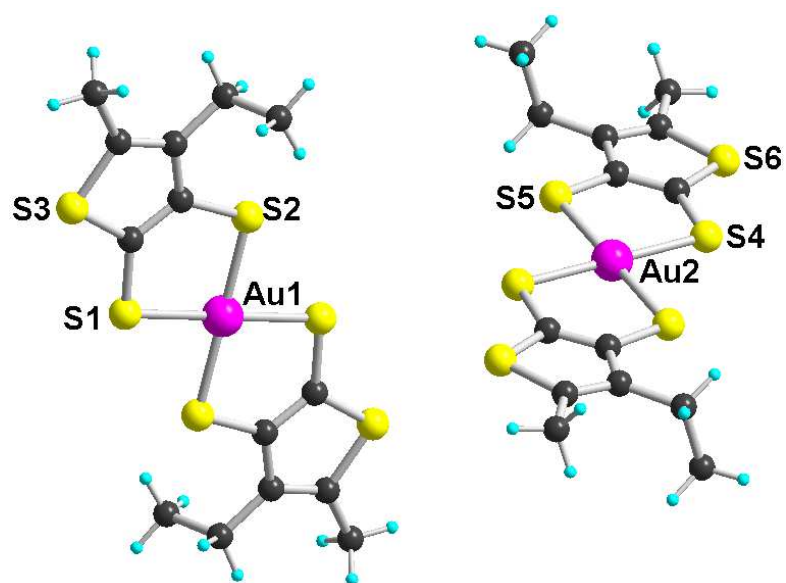

**Figure S5.** Molecular structures of the two crystallographically independent complexes in the  $\text{PPh}_4[\text{Au}(\alpha\text{-EtMetpdt})_2]$  salt **4b**.

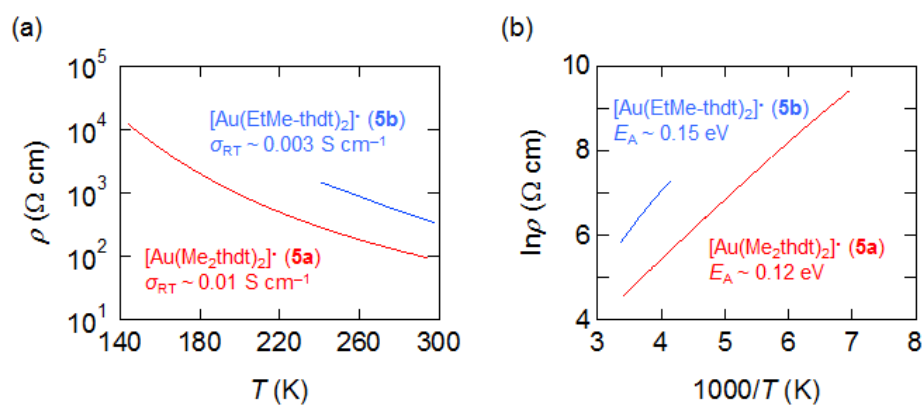

**Figure S6.** (a) Temperature dependence of the resistivity and (b) the Arrhenius plot for **5a** (red) and **5b** (blue).

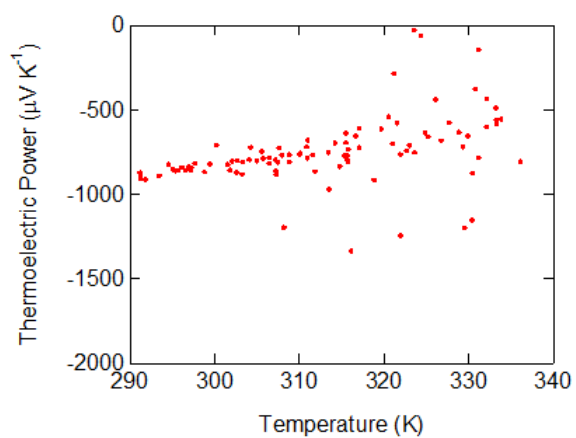

**Figure S7.** Temperature dependence of the thermoelectric power of  $[\text{Au}(\alpha\text{-EtMetpdt})_2]$  **5b.**
